# Supplementary material for: Assessment of Diversity of Culturable Marine Yeasts Associated with Corals and Zoanthids in the Gulf of Thailand, South China Sea
Source: PubMed Central journal article supplement (PMC7232451; doi:10.3390/microorganisms8040474), 2020-03-26
Supplement: microorganisms-08-00474-s001.pdf [file microorganisms-08-00474-s001.pdf]

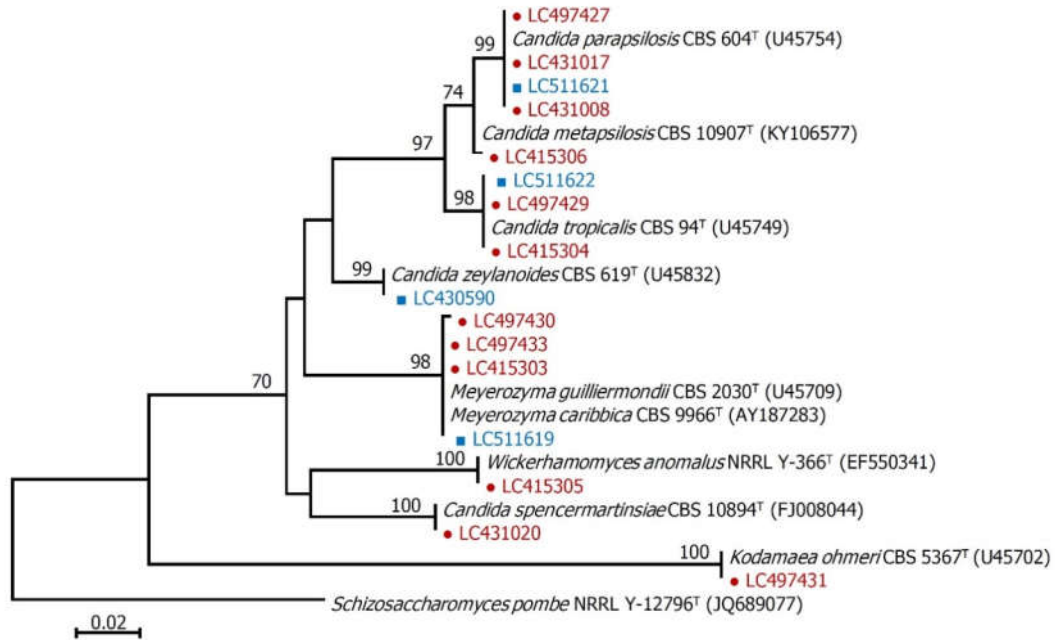

**Figure S1.** Phylogenetic relationship based on the sequence of the D1/D2 domain of the LSU rRNA gene of yeast species isolated from corals and zoanths in sampling site S1 (●) and sampling site S2 (■) in the phylum Ascomycota, and their closely related yeast species retrieved from the GenBank databases. The tree was constructed with the maximum-likelihood method and the general time reversible (GTR) evolutionary model in the MEGA software version 7.0. Numbers at nodes indicate the bootstrap percentage (>50%) derived from 1000 datasets. *Schizosaccharomyces pombe* NRRL Y-12796<sup>T</sup> (JQ689077) was used as the outgroup. The scale bar indicates an evolutionary distance of 0.02  $K_{nuc}$ .

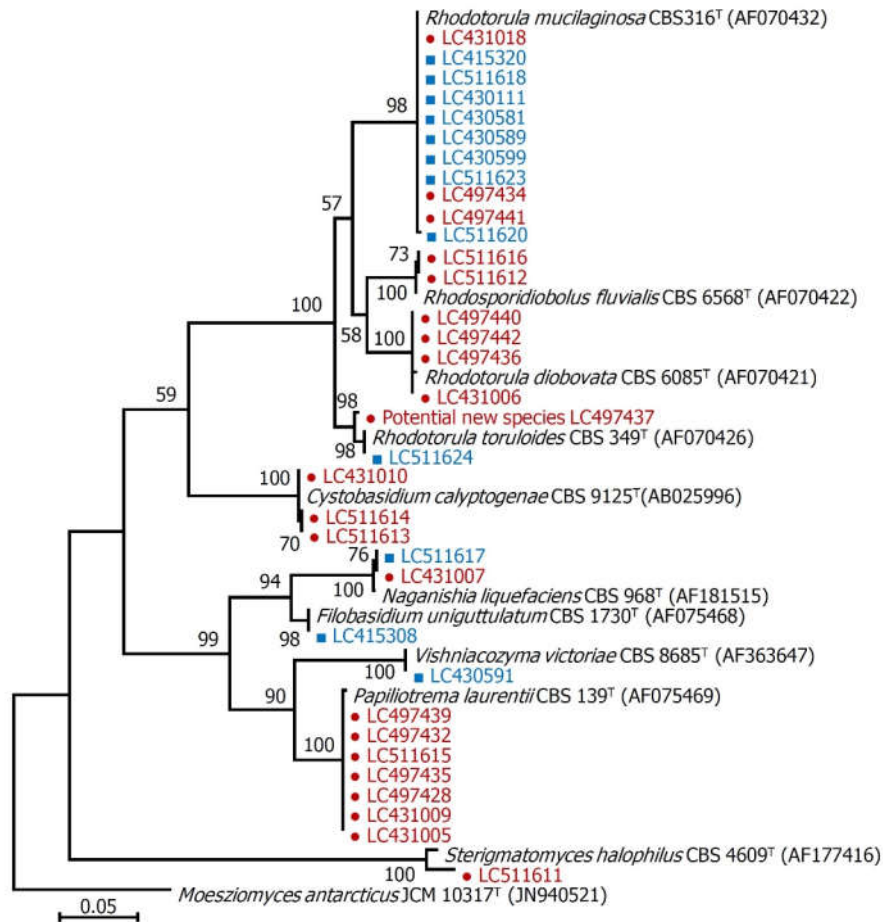

**Figure S2.** Phylogenetic relationship based on the sequence of the D1/D2 domain of the LSU rRNA gene of yeast species isolated from corals and zoanthids in sampling site S1 (●) and sampling site S2 (■) in the phylum Basidiomycota, and their closely related yeast species retrieved from the GenBank databases. The tree was constructed with the maximum-likelihood method and the GTR evolutionary model in the MEGA software version 7.0. Numbers at nodes indicate the bootstrap percentage (>50%) derived from 1000 datasets. *Moesziomyces antarcticus* JCM 10317<sup>T</sup> (JN940521) was used as the outgroup. The scale bar indicates an evolutionary distance of 0.05 K<sub>mc</sub>.

**Table S1.** Identification of yeast isolated from corals and zoanthids by analysis of the D1/D2 domain of the LSU rRNA gene and the ITS region.

| Strain<br>DMKU       | Closest species<br>(Accession no. of D1/D2; ITS)                                 | D1/D2 domain     |                    |               | ITS region             |                  |                    |               | Result of<br>identification |                             |
|----------------------|----------------------------------------------------------------------------------|------------------|--------------------|---------------|------------------------|------------------|--------------------|---------------|-----------------------------|-----------------------------|
|                      |                                                                                  | Accession<br>no. | No. of<br>identity | No. of<br>gap | No. of<br>substitution | Accession<br>no. | No. of<br>identity | No. of<br>gap |                             | No. of<br>substitution      |
| <b>Coral samples</b> |                                                                                  |                  |                    |               |                        |                  |                    |               |                             |                             |
| J7-1                 | <i>Papiliotrema laurentii</i> CBS139 <sup>T</sup> (AF075469)                     | LC431005         | 573/574            | 0             | 1                      | -                | -                  | -             | -                           | <i>P. laurentii</i>         |
| JC7-2                | <i>Rhodotorula diobovata</i> CBS6085 <sup>T</sup> (AF070421)                     | LC431006         | 532/533            | 0             | 1                      | -                | -                  | -             | -                           | <i>R. diobovata</i>         |
| JC7-4                | <i>Naganishia liquefaciens</i> CBS968 <sup>T</sup> (AF181515)                    | LC431007         | 555/556            | 0             | 1                      | -                | -                  | -             | -                           | <i>N. liquefaciens</i>      |
| JC7-5                | <i>Candida parapsilosis</i> CBS604 <sup>T</sup> (U45754)                         | LC431008         | 528/528            | 0             | 0                      | -                | -                  | -             | -                           | <i>C. parapsilosis</i>      |
| JC8-1                | <i>Papiliotrema laurentii</i> CBS139 <sup>T</sup> (AF075469)                     | LC431009         | 571/572            | 0             | 1                      | -                | -                  | -             | -                           | <i>P. laurentii</i>         |
| JC9-1                | <i>Cystobasidium calyptogenae</i> CBS9125 <sup>T</sup> (AB025996)                | LC431010         | 565/566            | 0             | 1                      | -                | -                  | -             | -                           | <i>Cys. calyptogenae</i>    |
| JC14-1               | <i>Candida parapsilosis</i> CBS604 <sup>T</sup> (U45754)                         | LC431017         | 519/519            | 0             | 0                      | -                | -                  | -             | -                           | <i>C. parapsilosis</i>      |
| JC15-1               | <i>Rhodotorula mucilaginosa</i> CBS316 <sup>T</sup> (AF070432)                   | LC431018         | 543/544            | 0             | 1                      | -                | -                  | -             | -                           | <i>R. mucilaginosa</i>      |
| J18-1                | <i>Candida spencermartinsiae</i> CBS10894 <sup>T</sup> (FJ008044)                | LC431020         | 505/505            | 0             | 0                      | -                | -                  | -             | -                           | <i>C. spencermartinsiae</i> |
| JC22-1               | <i>Candida parapsilosis</i> CBS604 <sup>T</sup> (U45754)                         | LC497427         | 535/535            | 0             | 0                      | -                | -                  | -             | -                           | <i>C. parapsilosis</i>      |
| JC24-1               | <i>Sterigmatomyces halophilus</i> CBS4609 <sup>T</sup> (AF177416)                | LC511611         | 585/592            | 6             | 1                      | -                | -                  | -             | -                           | <i>S. halophilus</i>        |
| JC25-1               | <i>Papiliotrema laurentii</i> CBS139 <sup>T</sup> (AF075469)                     | LC497428         | 606/607            | 0             | 1                      | -                | -                  | -             | -                           | <i>P. laurentii</i>         |
| JC25-2               | <i>Candida tropicalis</i> CBS94 <sup>T</sup> (U45749)                            | LC497429         | 529/529            | 0             | 0                      | -                | -                  | -             | -                           | <i>C. tropicalis</i>        |
| J33-2                | <i>Rhodotorula mucilaginosa</i> CBS316 <sup>T</sup> (AF070432)                   | LC497434         | 532/533            | 0             | 1                      | -                | -                  | -             | -                           | <i>R. mucilaginosa</i>      |
| J33-3                | <i>Papiliotrema laurentii</i> CBS139 <sup>T</sup> (AF075469)                     | LC497435         | 579/580            | 0             | 1                      | -                | -                  | -             | -                           | <i>P. laurentii</i>         |
| JC33-1               | <i>Rhodotorula diobovata</i> CBS6085 <sup>T</sup> (AF070421)                     | LC497436         | 549/550            | 0             | 1                      | -                | -                  | -             | -                           | <i>R. diobovata</i>         |
| JC33-2               | <i>Rhodospiridiobolus fluvialis</i> CBS6568 <sup>T</sup><br>(AF070422; NR077089) | LC511612         | 535/538            | 0             | 3                      | LC522501         | 593/598            | 0             | 5                           | <i>Rh. fluvialis</i>        |
| JC33-4               | <i>Cystobasidium calyptogenae</i> CBS9125 <sup>T</sup> (AB025996;<br>AB025996)   | LC511613         | 607/609            | 0             | 2                      | LC522502         | 557/562            | 1             | 4                           | <i>Cys. calyptogenae</i>    |
| JC35-1               | <i>Rhodotorula diobovata</i> CBS6085 <sup>T</sup> (AF070421)                     | LC497442         | 532/533            | 0             | 1                      | -                | -                  | -             | -                           | <i>R. diobovata</i>         |

| Strain<br>DMKU          | Closest species<br>(Accession no. of D1/D2; ITS)                               | D1/D2 domain     |                    |               |                        | ITS region       |                    |               |                        | Result of<br>identification                                 |
|-------------------------|--------------------------------------------------------------------------------|------------------|--------------------|---------------|------------------------|------------------|--------------------|---------------|------------------------|-------------------------------------------------------------|
|                         |                                                                                | Accession<br>no. | No. of<br>identity | No. of<br>gap | No. of<br>substitution | Accession<br>no. | No. of<br>identity | No. of<br>gap | No. of<br>substitution |                                                             |
| JC35-2                  | <i>Cystobasidium calyptogenae</i> CBS9125 <sup>T</sup><br>(AB025996; AB025996) | LC511614         | 607/609            | 0             | 2                      | LC522503         | 559/564            | 1             | 4                      | <i>Cys. calyptogenae</i>                                    |
| JC46-1                  | <i>Papiliotrema laurentii</i> CBS139 <sup>T</sup> (AF075469)                   | LC511615         | 562/563            | 0             | 1                      | -                | -                  | -             | -                      | <i>P. laurentii</i>                                         |
| C322-1                  | <i>Filobasidium uniguttulatum</i> CBS1730 <sup>T</sup> (AF075468)              | LC415308         | 564/564            | 0             | 0                      | -                | -                  | -             | -                      | <i>F. uniguttulatum</i>                                     |
| 3222-1                  | <i>Rhodotorula mucilaginosa</i> CBS316 <sup>T</sup> (AF070432)                 | LC415320         | 552/555            | 2             | 1                      | -                | -                  | -             | -                      | <i>R. mucilaginosa</i>                                      |
| 3222-2                  | <i>Naganishia liquefaciens</i> CBS968 <sup>T</sup> (AF181515)                  | LC511617         | 596/597            | 0             | 1                      | -                | -                  | -             | -                      | <i>N. liquefaciens</i>                                      |
| 3236-1                  | <i>Rhodotorula mucilaginosa</i> CBS316 <sup>T</sup> (AF070432)                 | LC511618         | 554/555            | 0             | 1                      | -                | -                  | -             | -                      | <i>R. mucilaginosa</i>                                      |
| 729-1                   | <i>Rhodotorula mucilaginosa</i> CBS316 <sup>T</sup> (AF070432)                 | LC430111         | 554/555            | 1             | 0                      | -                | -                  | -             | -                      | <i>R. mucilaginosa</i>                                      |
| 7231-1                  | <i>Rhodotorula mucilaginosa</i> CBS316 <sup>T</sup> (AF070432)                 | LC430581         | 550/550            | 0             | 0                      | -                | -                  | -             | -                      | <i>R. mucilaginosa</i>                                      |
| 7235-1                  | <i>Rhodotorula mucilaginosa</i> CBS316 <sup>T</sup> (AF070432)                 | LC430589         | 549/550            | 0             | 1                      | -                | -                  | -             | -                      | <i>R. mucilaginosa</i>                                      |
| C7235-3                 | <i>Candida zeylanoides</i> CBS619 <sup>T</sup> (U45832)                        | LC430590         | 515/515            | 0             | 0                      | -                | -                  | -             | -                      | <i>C. zeylanoides</i>                                       |
| C7235-4                 | <i>Vishniacozyma victoriae</i> CBS8685 <sup>T</sup> (AF363647)                 | LC430591         | 550/550            | 0             | 0                      | -                | -                  | -             | -                      | <i>V. victoriae</i>                                         |
| 7241-1                  | <i>Rhodotorula mucilaginosa</i> CBS316 <sup>T</sup> (AF070432)                 | LC430599         | 555/556            | 1             | 0                      | -                | -                  | -             | -                      | <i>R. mucilaginosa</i>                                      |
| FC12-1                  | <i>Meyerozyma caribbica</i> CBS9966 <sup>T</sup> (AY187283)                    | LC511619         | 519/519            | 0             | 0                      | -                | -                  | -             | -                      | <i>M. caribbica</i>                                         |
| FC12-2                  | <i>Rhodotorula mucilaginosa</i> CBS316 <sup>T</sup> (AF070432)                 | LC511620         | 533/534            | 0             | 1                      | -                | -                  | -             | -                      | <i>R. mucilaginosa</i>                                      |
| FC12-3                  | <i>Candida parapsilosis</i> CBS604 <sup>T</sup> (U45754)                       | LC511621         | 524/524            | 0             | 0                      | -                | -                  | -             | -                      | <i>C. parapsilosis</i>                                      |
| FC12-4                  | <i>Candida tropicalis</i> CBS94 <sup>T</sup> (U45749)                          | LC511622         | 523/523            | 0             | 0                      | -                | -                  | -             | -                      | <i>C. tropicalis</i>                                        |
| J37-1                   | <i>Rhodotorula toruloides</i> CBS349 <sup>T</sup><br>(AF070426; AF444489)      | LC497437         | 583/588            | 0             | 5                      | LC522504         | 579/588            | 3             | 6                      | Potential new<br>species closest to<br><i>R. toruloides</i> |
| <b>Zoanthid samples</b> |                                                                                |                  |                    |               |                        |                  |                    |               |                        |                                                             |
| 319-1                   | <i>Meyerozyma guilliermondii</i> CBS2030 <sup>T</sup> (U45709)                 | LC415303         | 542/545            | 1             | 2                      | -                | -                  | -             | -                      | <i>M. guilliermondii</i>                                    |
| 319-2                   | <i>Candida tropicalis</i> CBS94 <sup>T</sup> (U45749)                          | LC415304         | 544/545            | 1             | 0                      | -                | -                  | -             | -                      | <i>C. tropicalis</i>                                        |

| Strain<br>DMKU | Closest species<br>(Accession no. of D1/D2; ITS)                                 | D1/D2 domain     |                    |               | ITS region             |                  |                    |               | Result of<br>identification |                          |
|----------------|----------------------------------------------------------------------------------|------------------|--------------------|---------------|------------------------|------------------|--------------------|---------------|-----------------------------|--------------------------|
|                |                                                                                  | Accession<br>no. | No. of<br>identity | No. of<br>gap | No. of<br>substitution | Accession<br>no. | No. of<br>identity | No. of<br>gap |                             | No. of<br>substitution   |
| C319-1         | <i>Wickerhamomyces anomalus</i> NRRL_Y-366 <sup>T</sup><br>(EF550341)            | LC415305         | 553/556            | 2             | 1                      | -                | -                  | -             | -                           | <i>W. anomalus</i>       |
| C319-2         | <i>Candida metapsilosis</i> CBS10907 <sup>T</sup> (KY106577)                     | LC415306         | 552/554            | 1             | 1                      | -                | -                  | -             | -                           | <i>C. metapsilosis</i>   |
| J29-5          | <i>Meyerozyma guilliermondii</i> CBS2030 <sup>T</sup> (U45709)                   | LC497430         | 532/534            | 0             | 2                      | -                | -                  | -             | -                           | <i>M. guilliermondii</i> |
| JC29-2         | <i>Kodamaea ohmeri</i> CBS5367 <sup>T</sup> (U45702)                             | LC497431         | 442/442            | 0             | 0                      | -                | -                  | -             | -                           | <i>K. ohmeri</i>         |
| JC29-6         | <i>Papiliotrema laurentii</i> CBS139 <sup>T</sup> (AF075469)                     | LC497432         | 573/574            | 0             | 1                      | -                | -                  | -             | -                           | <i>P. laurentii</i>      |
| JC29-7         | <i>Meyerozyma caribbica</i> CBS9966 <sup>T</sup> (AY187283)                      | LC497433         | 519/519            | 0             | 0                      | -                | -                  | -             | -                           | <i>M. caribbica</i>      |
| JC34-1         | <i>Papiliotrema laurentii</i> CBS139 <sup>T</sup> (AF075469)                     | LC497439         | 576/577            | 0             | 1                      | -                | -                  | -             | -                           | <i>P. laurentii</i>      |
| JC34-2         | <i>Rhodotorula diobovata</i> CBS6085 <sup>T</sup> (AF070421)                     | LC497440         | 532/533            | 0             | 1                      | -                | -                  | -             | -                           | <i>R. diobovata</i>      |
| JC34-5         | <i>Rhodospiridiobolus fluvialis</i> CBS6568 <sup>T</sup> (AF070422;<br>NR077089) | LC511616         | 546/549            | 0             | 3                      | LC522505         | 588/593            | 0             | 5                           | <i>Rh. fluvialis</i>     |
| JC34-7         | <i>Rhodotorula mucilaginosa</i> CBS316 <sup>T</sup> (AF070432)                   | LC497441         | 533/534            | 0             | 1                      | -                | -                  | -             | -                           | <i>R. mucilaginosa</i>   |
| F9-1           | <i>Rhodotorula mucilaginosa</i> CBS316 <sup>T</sup> (AF070432)                   | LC511623         | 533/534            | 0             | 1                      | -                | -                  | -             | -                           | <i>R. mucilaginosa</i>   |
| FC9-1          | <i>Rhodotorula toruloides</i> CBS349 <sup>T</sup> (AF070426)                     | LC511624         | 532/532            | 0             | 0                      | -                | -                  | -             | -                           | <i>R. toruloides</i>     |
